# Supplementary material
Source: PubMed Central journal article supplement (PMC5998832)
Supplement: Supp_Fig1.pdf [file Supp_Fig1.pdf]

## Supplementary Data

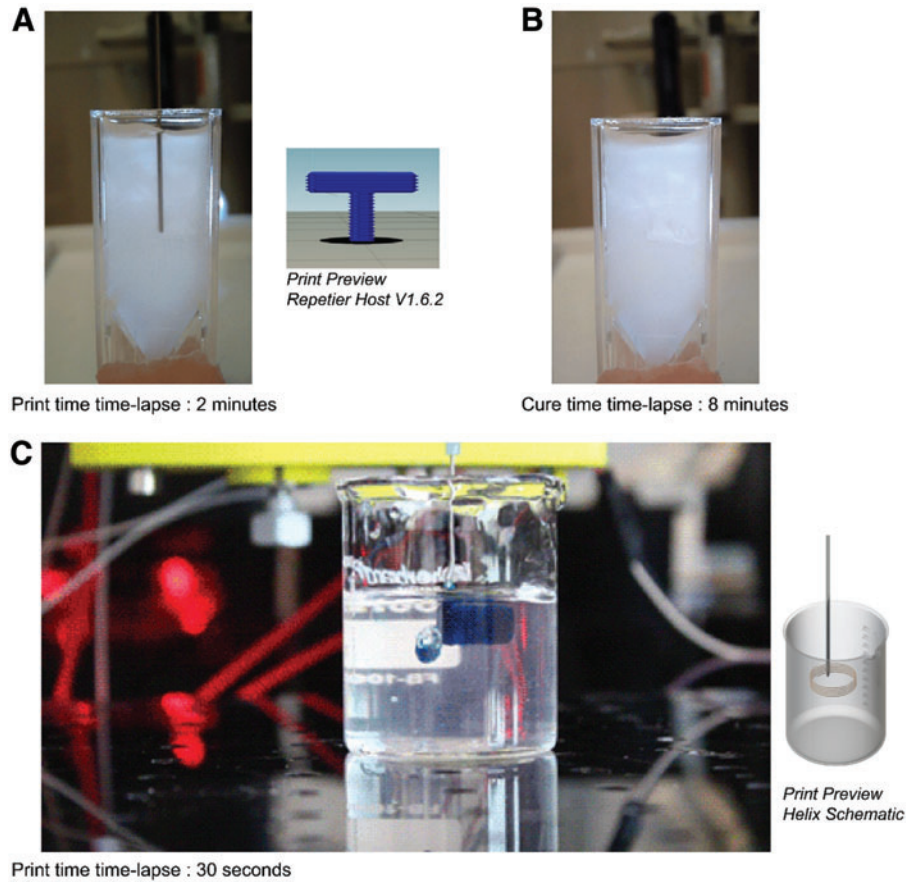

**SUPPLEMENTARY FIG. S1.** Schematic depicting phases of silk fibroin printing/curing and demonstration of freeform printing with dye with video legends. **(A)** Preview of Supplementary Video S1 with silk printing time lapse in curing medium. Print preview of T-shaped cantilever showing print paths generated in Repetier Host V1.6.2 shown in *inset* on *right*. **(B)** Preview of Supplementary Video S2 depicting curing of freeform-printed silk fibroin in time lapse over 8 min. **(C)** Preview of Supplementary Video S3 demonstrating freeform printing technique with helix printed with *blue* No. 2 dyed silk solution. Print preview schematic showing helical print path shown in *inset* on *right*. All syringe tips in videos 20G.
