# Supplementary material
Source: PubMed Central journal article supplement (PMC5998832)
Supplement: Supp_Fig3.pdf [file Supp_Fig3.pdf]

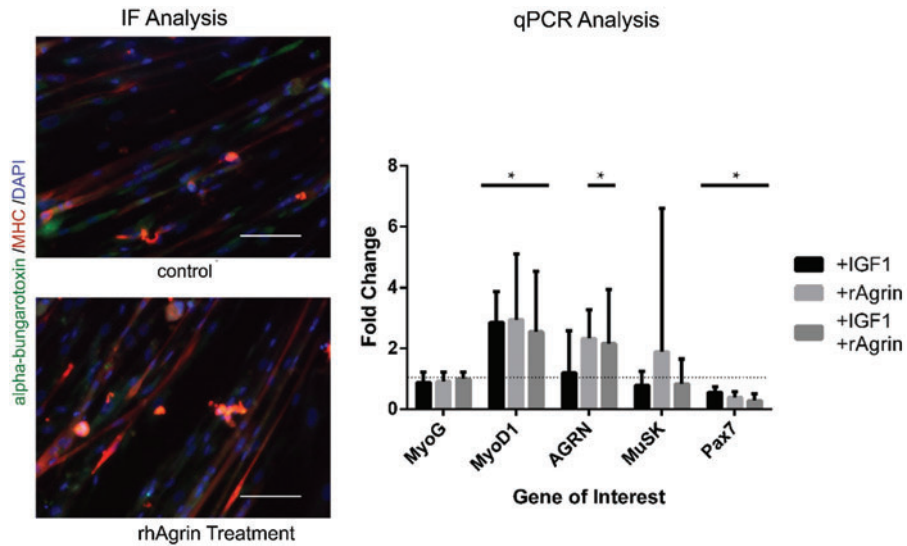

**SUPPLEMENTARY FIG. S3.** Myogenic response of hSKMs to rAgrin and IGF-1. (Left) IF imaging of hSKMs plated in 2D silk/collagen gels with 1% silk fibroin with 2 mg/mL collagen I treatment beginning day 7 and carrying on for 7 days of differentiation. (Right) Muscle differentiation-related genes *MYOG*, *MyoD*, *AGRN*, *MuSK*, and *Pax7* quantified with quantitative PCR at day 14, 7 days after beginning of 25 nM IGF-1, 40 mU rAgrin treatment. Fold change indicated on Y-axis with baseline of null hypothesis of no change (fold change = 1) shown with dotted line. Significance of fold change with \* indicates  $p < 0.05$ . Error bars indicate standard error. Scale bars 100  $\mu$ m. PCR, polymerase chain reaction.
