# Supplementary material
Source: PubMed Central journal article supplement (PMC5998832)
Supplement: Supp_Fig7.pdf [file Supp_Fig7.pdf]

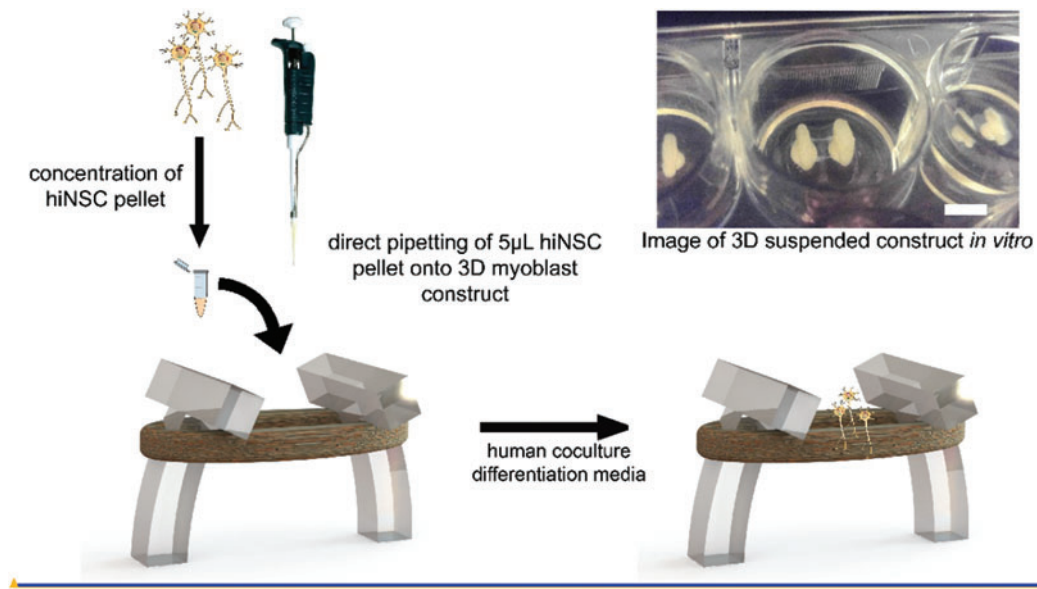

**SUPPLEMENTARY FIG. S7.** Brief coculture schematic illustrating direct pipetting method for introducing concentrated differentiated hiNSCs to 3D myoblast constructs. hiNSCs differentiated for 2 weeks in specified neuronal differentiation media with shh agonist, and subsequently were concentrated to a cell pellet with supernatant removed. Five microliters of cell pellet was removed with a micropipette and directly added to 3D myoblast construct suspended in between silk cantilevers. Media were removed from wells before cell addition to facilitate adhesion (photo in *top right*, scale bar 5 mm). Cocultures were then grown in coculture differentiation media for up to four additional weeks.
